# Supplementary material
Source: PubMed Central journal article supplement (PMC1838594)

**A**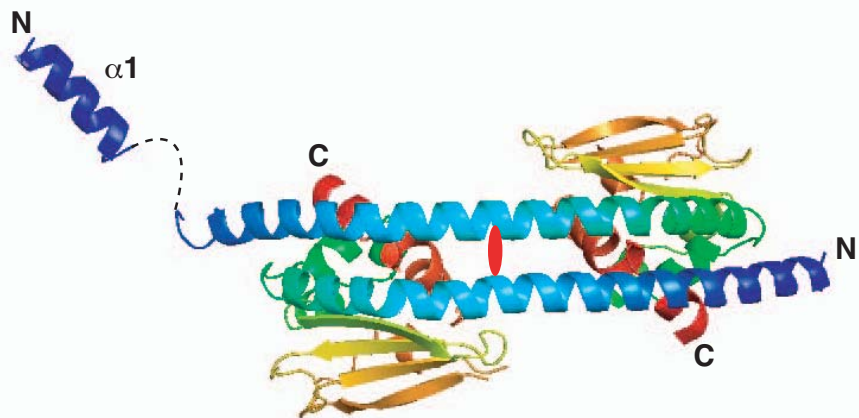**B**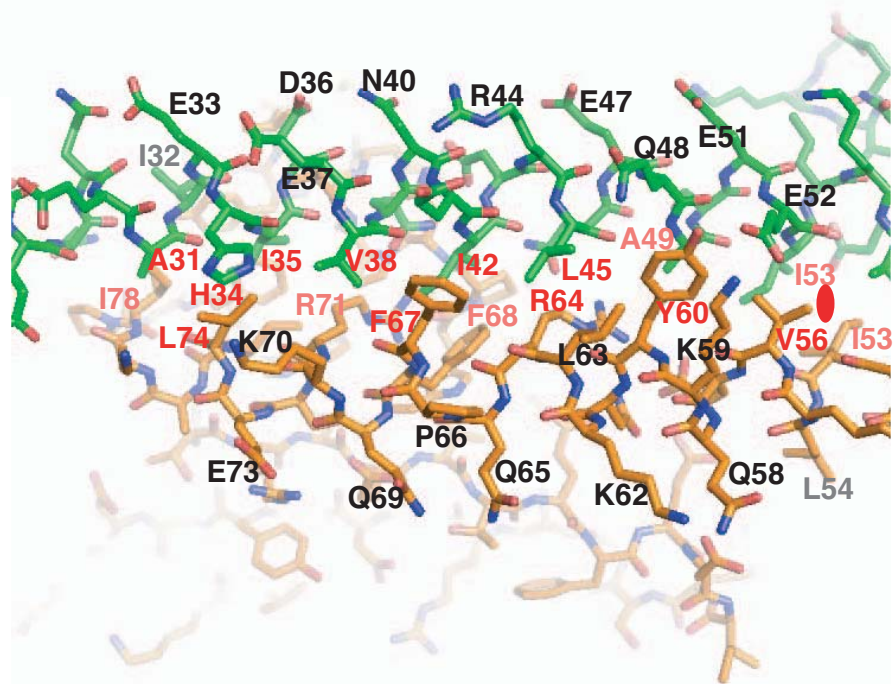

Supplement: pnas_0603762104_1.pdf [file pnas_0603762104_1.pdf]

**A**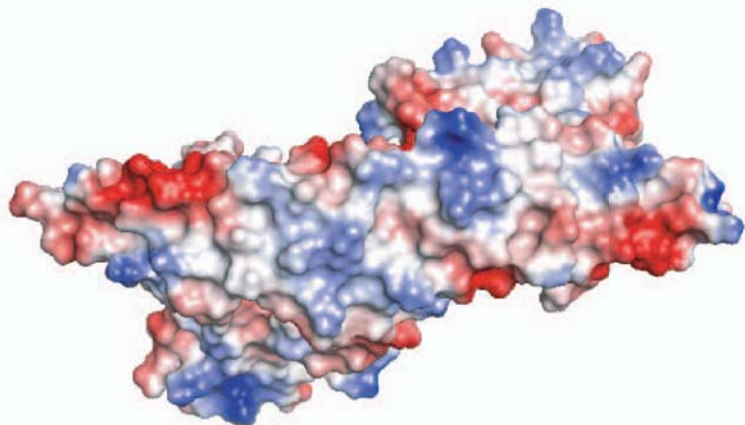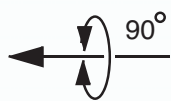**B**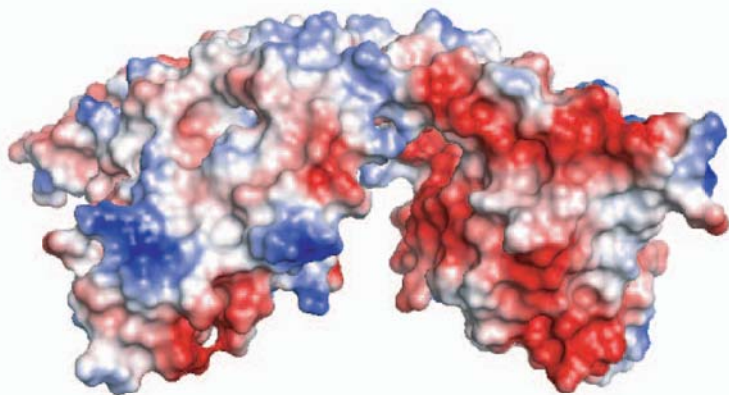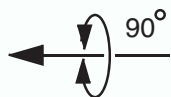**C**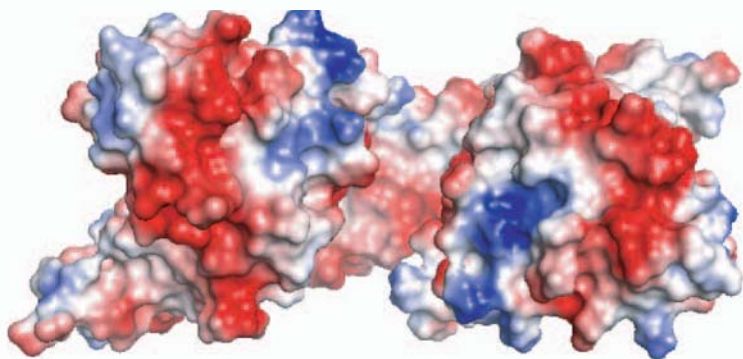

Supplement: pnas_0603762104_2.pdf [file pnas_0603762104_2.pdf]

wt A B C D E F G H I J K L M N O P Q R

205—  
116—  
80—  
55—  
45—  
30—  
21—  
14—

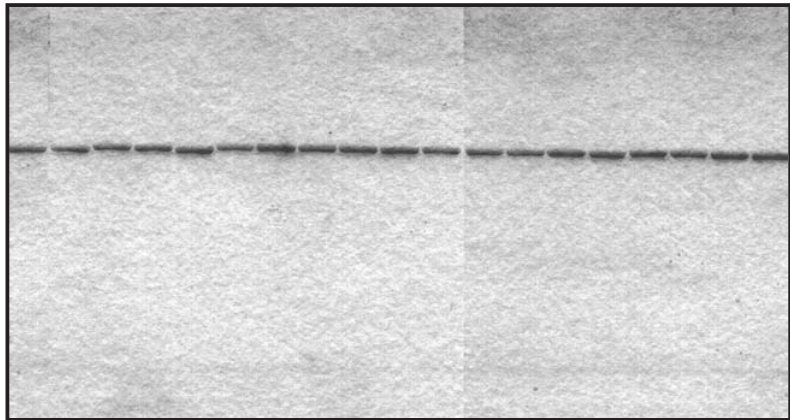

1 2 3 4 5 6 7 8 9 10 11 12 13 14 15 16 17 18 19

Supplement: pnas_0603762104_3.pdf [file pnas_0603762104_3.pdf]

**A**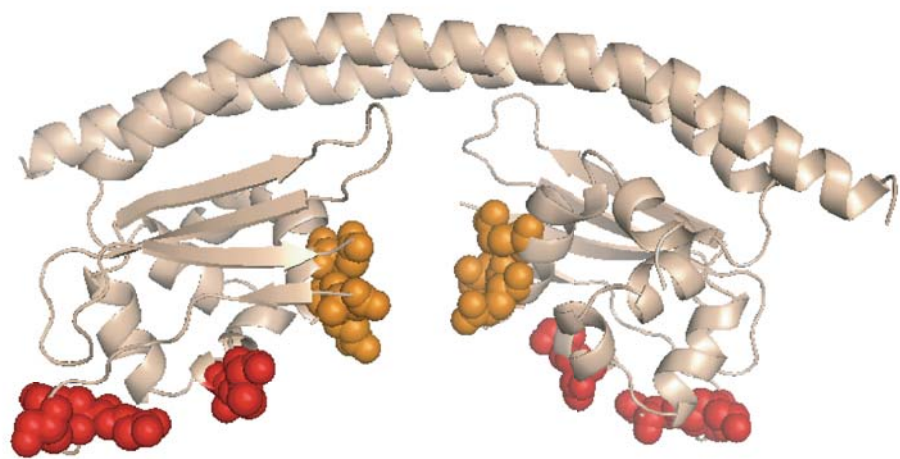**B**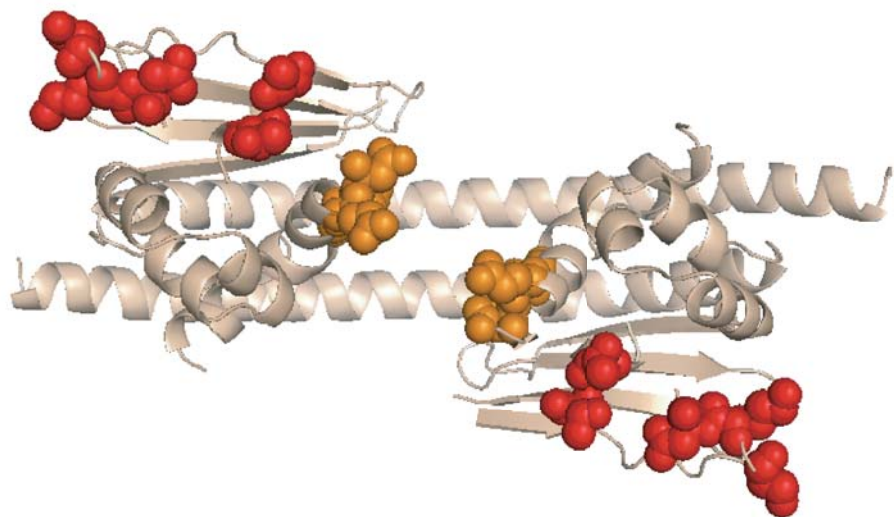

Supplement: pnas_0603762104_4.pdf [file pnas_0603762104_4.pdf]
